# Supplementary material for: Intensivbettenbedarf für COVID‑19 im Herbst/Winter 2021
Source: Springer Nature journal article supplement (doi:10.1007/s00063-021-00862-9), 2021-08-09
Supplement: MOESM1 [file 19553910]

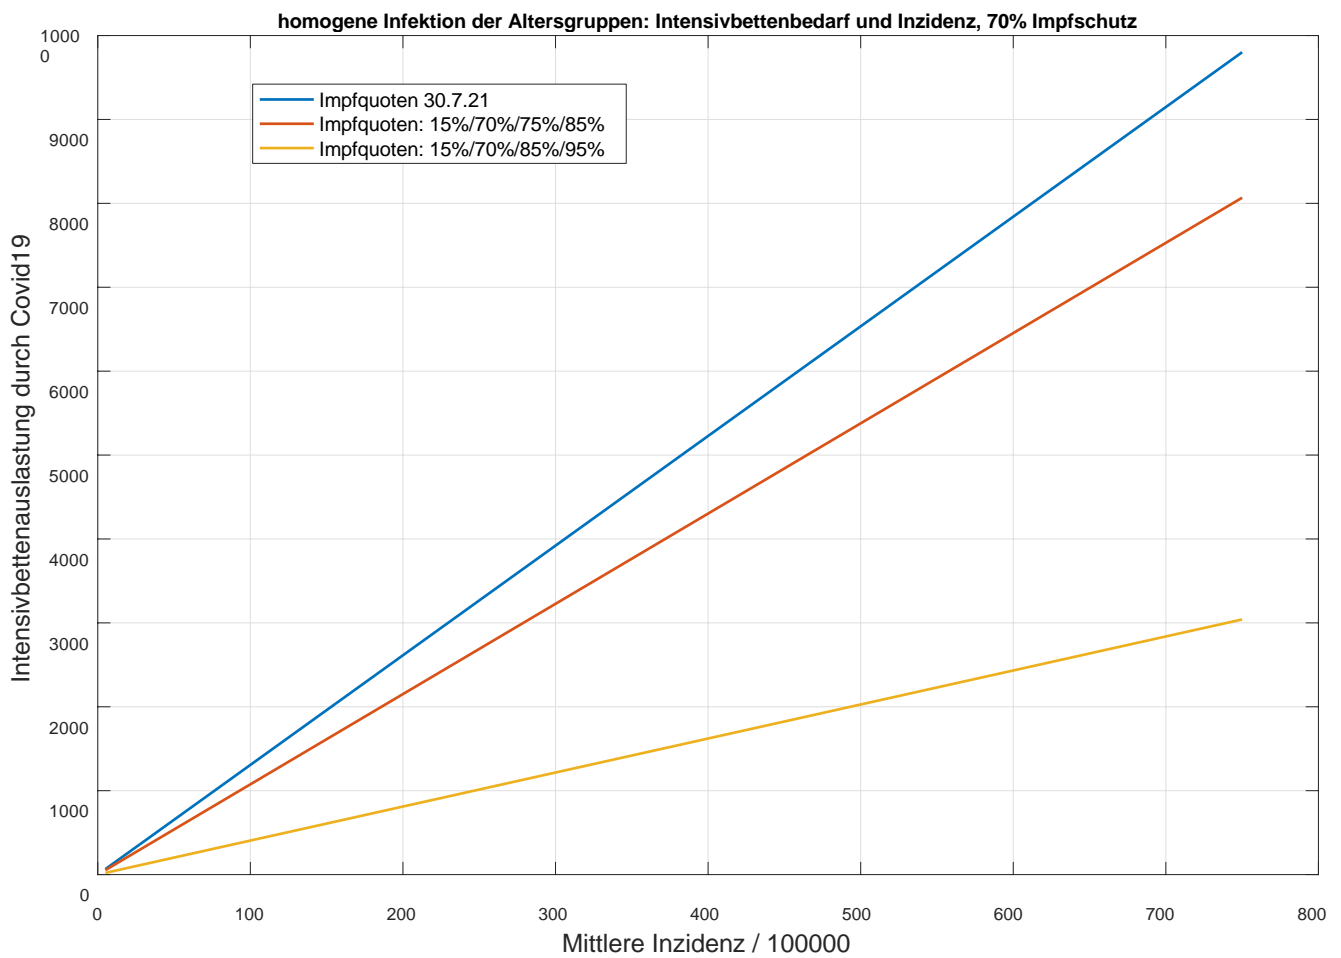

Abbildung S1: Intensiv-Bettenbedarf: 70% Impfschutz, a) Impfquoten 30.7., b) pessimistisches Szenario (U15: 15%, 15-34: 70%, 35-59: 75%, Ü60: 85%), c) optimistisches Szenario (U15: 15%, 15-34: 70%, 35-59: 85%, Ü60: 95%)

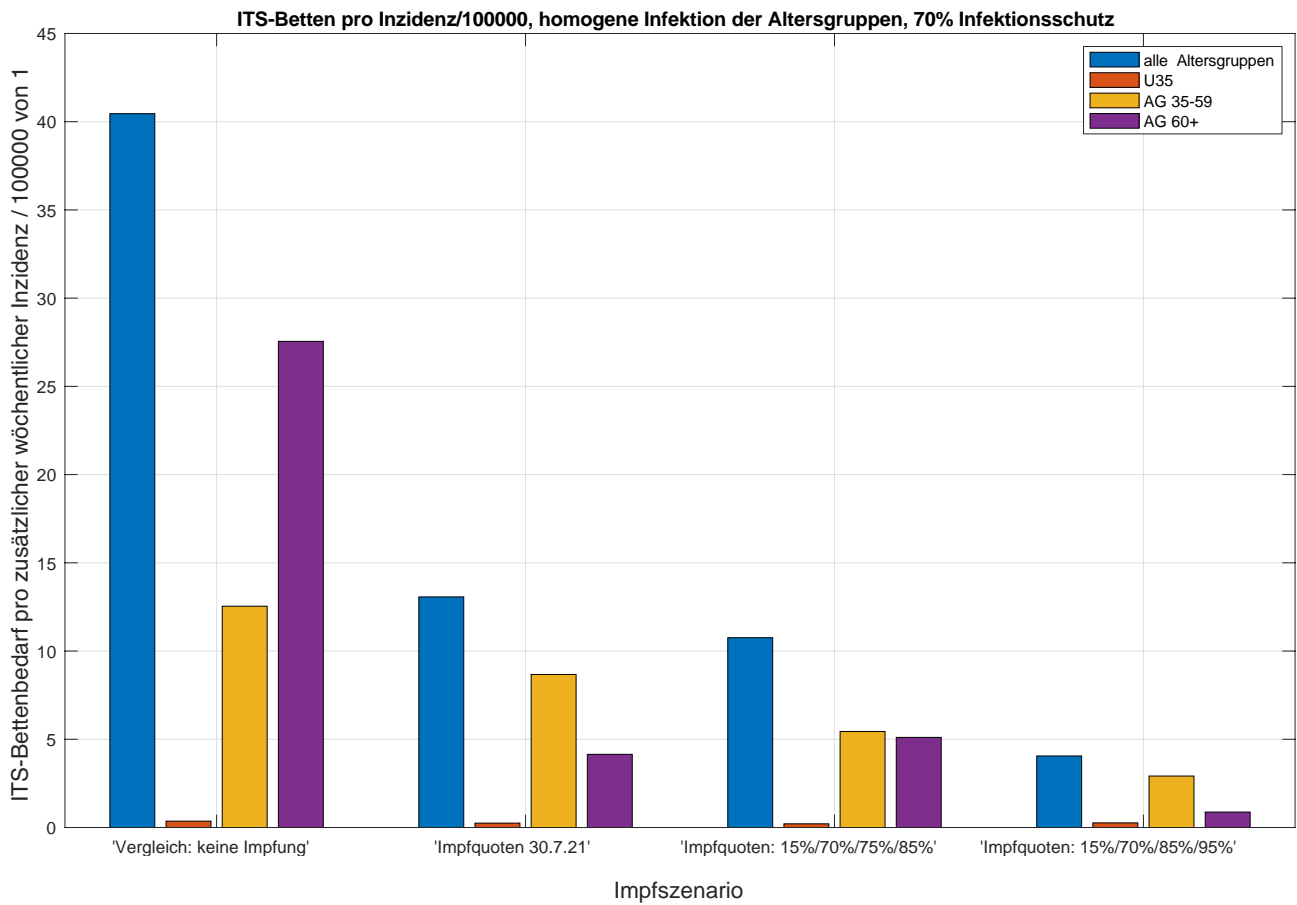

Abbildung S2: Zunahme des Intensiv-Bettenbedarfs pro Infektion / Woche auf 100000 Einwohner bei homogener Verteilung der Infektionen auf die Altersgruppen, Impfschutz 70%

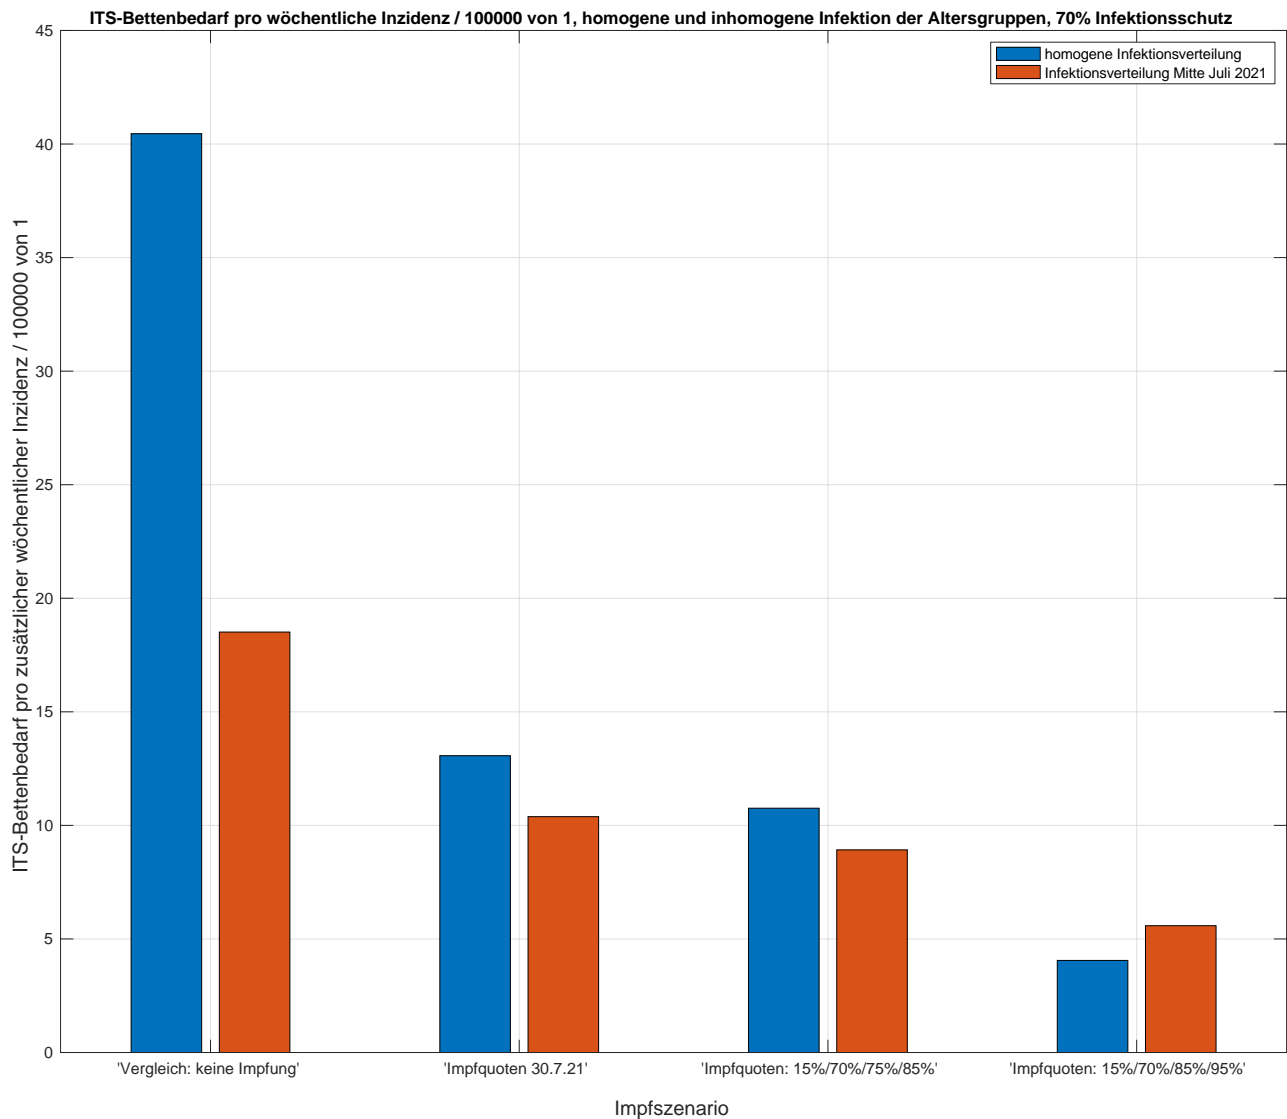

Abbildung S3: Impact einer auf jüngere Kohorten konzentrierten Infektionsdynamik auf den Intensiv-Bettenbedarf / (Wocheninzidenz/100000 Einwohner) – 70% Impfschutz
